# Supplementary material
Source: PubMed Central journal article supplement (PMC5910034)
Supplement: Supp_Data.pdf [file Supp_Data.pdf]

## Supplemental data

**Table S1.** Prediabetes and diabetes in adulthood, by gender and birth weight category [n (%)]

|              | Females    |             |            | Males      |             |            |
|--------------|------------|-------------|------------|------------|-------------|------------|
|              | LBW        | NBW         | HBW        | LBW        | NBW         | HBW        |
| Normal       | 436 (73.6) | 3396 (81.6) | 414 (84.4) | 308 (70.8) | 2618 (75.2) | 526 (77.5) |
| Pre-diabetes | 95 (15.8)  | 606 (12.9)  | 58 (10.8)  | 120 (22.7) | 732 (19.2)  | 116 (17.5) |
| Diabetes     | 53 (10.6)  | 272 (5.6)   | 29 (4.8)   | 38 (6.5)   | 209 (5.6)   | 41 (5.0)   |

<sup>1</sup>National Longitudinal Study for Adolescent and Adult Health: 5,359 females and 4,708 males with nonmissing birth weight and diabetes data,  $\geq 2$  BMI measures; non-Hispanic white, non-Hispanic black, or Hispanic race/ethnicity; 12 years of age or older at Wave I.

**Table S2:** Crude associations between birth weight, BMI trajectory, and pre/diabetes in adulthood: females

|                           | Outcome:<br>pre/diabetes <sup>2</sup> | Outcome: BMI<br>intercept <sup>3</sup> | Outcome: BMI<br>slope <sup>3</sup> |
|---------------------------|---------------------------------------|----------------------------------------|------------------------------------|
| <b>Model 1</b>            |                                       |                                        |                                    |
| Birth weight              | <b>-0.28 (-0.43, -0.13)</b>           | --                                     | --                                 |
| <b>Model 2</b>            |                                       |                                        |                                    |
| Birth weight              | --                                    | -2.54 (-4.68, -0.40)                   | 1.10 (-0.54, 2.73)                 |
| Birth weight <sup>2</sup> | --                                    | 0.48 (0.12, 0.83)                      | -0.15 (-0.42, 0.11)                |
| <b>Model 3</b>            |                                       |                                        |                                    |
| Birth weight              | -0.36 (-0.51, -0.20)                  | <b>-2.39 (-4.47, -0.32)</b>            | 0.96 (-0.59, 2.51)                 |
| Birth weight <sup>2</sup> | --                                    | <b>0.45 (0.11, 0.79)</b>               | -0.13 (-0.38, 0.12)                |
| BMI intercept             | <b>0.10 (0.07, 0.12)</b>              | --                                     | --                                 |
| BMI slope                 | <b>0.11 (0.08, 0.14)</b>              | --                                     | --                                 |

<sup>1</sup>National Longitudinal Study for Adolescent and Adult Health (n=7,011 females in Model 3). Associations estimated from gender-stratified path analysis models.

<sup>2</sup>Log-odds estimates (95% confidence interval); Odds Ratios are calculated as  $\exp(\text{coefficient})$

<sup>3</sup>Unstandardized linear regression coefficients

**Table S3:** Crude associations between birth weight, BMI trajectory, and pre/diabetes in adulthood: males

|                |                           | <b>Outcome:<br/>pre/diabetes<sup>2</sup></b> | <b>Outcome: BMI<br/>intercept<sup>3</sup></b> | <b>Outcome: BMI<br/>slope<sup>3</sup></b> |
|----------------|---------------------------|----------------------------------------------|-----------------------------------------------|-------------------------------------------|
| <b>Model 1</b> |                           |                                              |                                               |                                           |
|                | Birth weight              | <b>-0.18 (-0.33, -0.03)</b>                  | --                                            | --                                        |
| <b>Model 2</b> |                           |                                              |                                               |                                           |
|                | Birth weight              | --                                           | -0.95 (-2.66, 0.76)                           | 0.97 (-0.36, 2.31)                        |
|                | Birth weight <sup>2</sup> | --                                           | 0.24 (-0.02, 0.50)                            | -0.16 (-0.37, 0.05)                       |
| <b>Model 3</b> |                           |                                              |                                               |                                           |
|                | Birth weight              | -0.19 (-0.36, -0.03)                         | -0.88 (-2.55, 0.78)                           | 0.75 (-0.56, 2.07)                        |
|                | Birth weight <sup>2</sup> | --                                           | 0.22 (-0.03, 0.47)                            | -0.12 (-0.32, 0.09)                       |
|                | BMI intercept             | <b>0.04 (0.00, 0.07)</b>                     | --                                            | --                                        |
|                | BMI slope                 | <b>0.22 (0.14, 0.30)</b>                     | --                                            | --                                        |

<sup>1</sup>National Longitudinal Study for Adolescent and Adult Health (n=6,399 males in Model 3). Associations estimated from gender-stratified path analysis models.

<sup>2</sup>Log-odds estimates (95% confidence interval); Odds Ratios are calculated as exp(coefficient)

<sup>3</sup>Unstandardized linear regression coefficients

**Table S4:** Associations between birth weight, BMI trajectory, and pre-diabetes in adulthood<sup>1</sup>

|                         |                           | <b>Outcome:<br/>pre/diabetes<sup>2</sup></b> | <b>Outcome: BMI<br/>intercept<sup>3</sup></b> | <b>Outcome: BMI<br/>slope<sup>3</sup></b> |
|-------------------------|---------------------------|----------------------------------------------|-----------------------------------------------|-------------------------------------------|
| <b>Females: Model 3</b> |                           |                                              |                                               |                                           |
|                         | Birth weight              | -0.13 (-0.32, 0.07)                          | -1.78 (-3.90, 0.33)                           | 1.19 (-0.45, 2.82)                        |
|                         | Birth weight <sup>2</sup> | --                                           | 0.39 (0.04, 0.73)                             | -0.14 (-0.40, 0.12)                       |
|                         | BMI intercept             | 0.06 (0.03, 0.09)                            | --                                            | --                                        |
|                         | BMI slope                 | 0.12 (0.07, 0.17)                            | --                                            | --                                        |
| <b>Males: Model 3</b>   |                           |                                              |                                               |                                           |
|                         | Birth weight              | -0.07 (-0.26, 0.13)                          | -1.57 (-3.45, 0.31)                           | 0.68 (-0.68, 2.04)                        |
|                         | Birth weight <sup>2</sup> | --                                           | 0.32 (0.04, 0.60)                             | -0.10 (-0.31, 0.11)                       |
|                         | BMI intercept             | 0.01 (-0.03, 0.05)                           | --                                            | --                                        |
|                         | BMI slope                 | 0.28 (0.18, 0.37)                            | --                                            | --                                        |

<sup>1</sup>National Longitudinal Study for Adolescent and Adult Health (n=6,087 females and 5,387 males, excluding participants with diabetes). Associations estimated from gender-stratified path analysis models predicting latent BMI trajectories from adolescence (age 12-19) to adulthood (age 25-32). Models adjusted for race/ethnicity, parental education, parental income at Wave I; and time-varying smoking, participant income, and participant education.

<sup>2</sup>Log-odds estimates (95% confidence interval); Odds Ratios are calculated as exp(coefficient)

<sup>3</sup>Unstandardized linear regression coefficients
